# Supplementary material for: Uncovering the structural stabilities of the functional bismuth containing oxides: a case study of α-Bi2O3nanoparticles in aqueous solutions
Source: Royal Society of Chemistry journal article supplement (doi:10.1039/c0nj00410c), 2010-10-19
Supplement: c0nj00410c.pdf [file c0nj00410c.pdf]

---

## Supporting Information

**Table S1:** Chemical composition of sample B stored in air for 6 months.

| Element          | C    | Bi    |
|------------------|------|-------|
| Mass content (%) | 2.85 | 75.63 |

From value listed in Table S1, the molar ratio of C to Bi in sample B<sub>stor</sub> is calculated to be 0.66, slightly larger than 0.50 for Bi<sub>2</sub>O<sub>2</sub>CO<sub>3</sub>. Excess C might be originated from the adsorbed CO<sub>2</sub> from air.

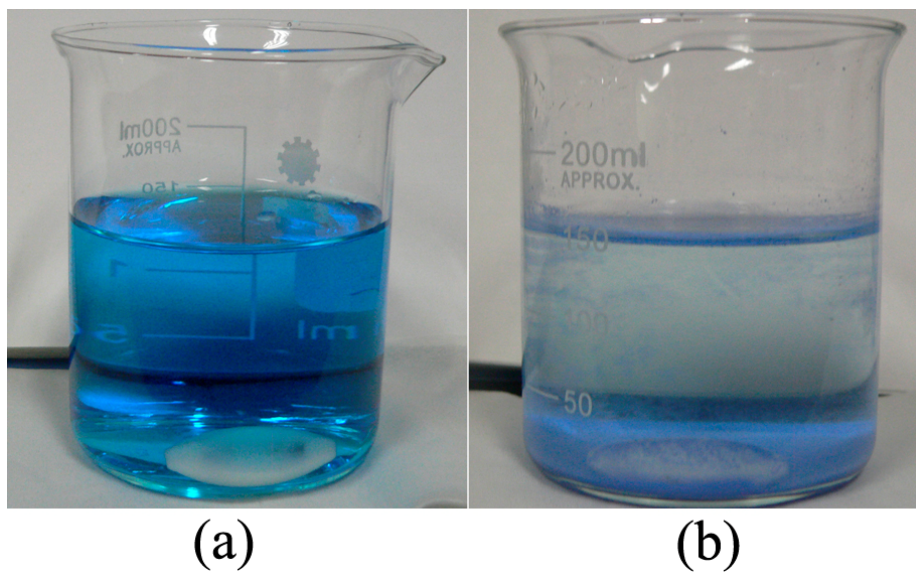

**Figure S1:** Photos of MB solutions at presence of sample B<sub>as</sub> with stirring time for (a) 0h and (b) 9h.

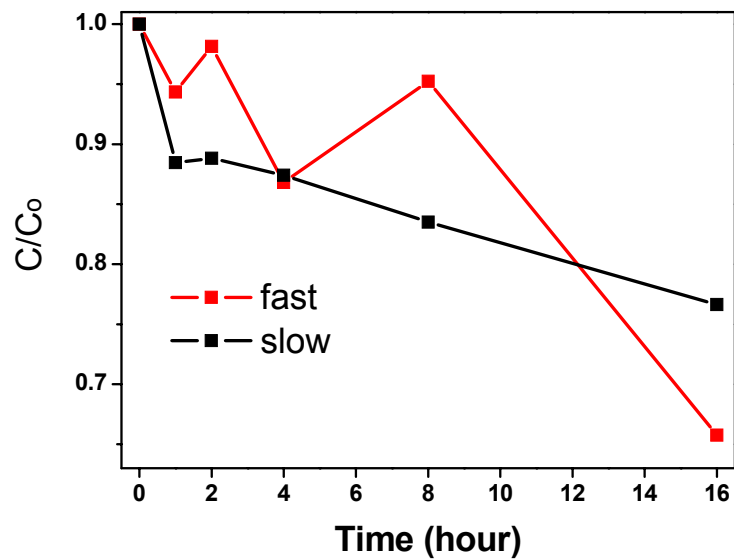

**Figure S2:** Time-dependent concentration variation of MB solution in the presence of  $\text{Bi}_2\text{O}_3$  samples at either a fast stirring rate or a slow stirring rate.

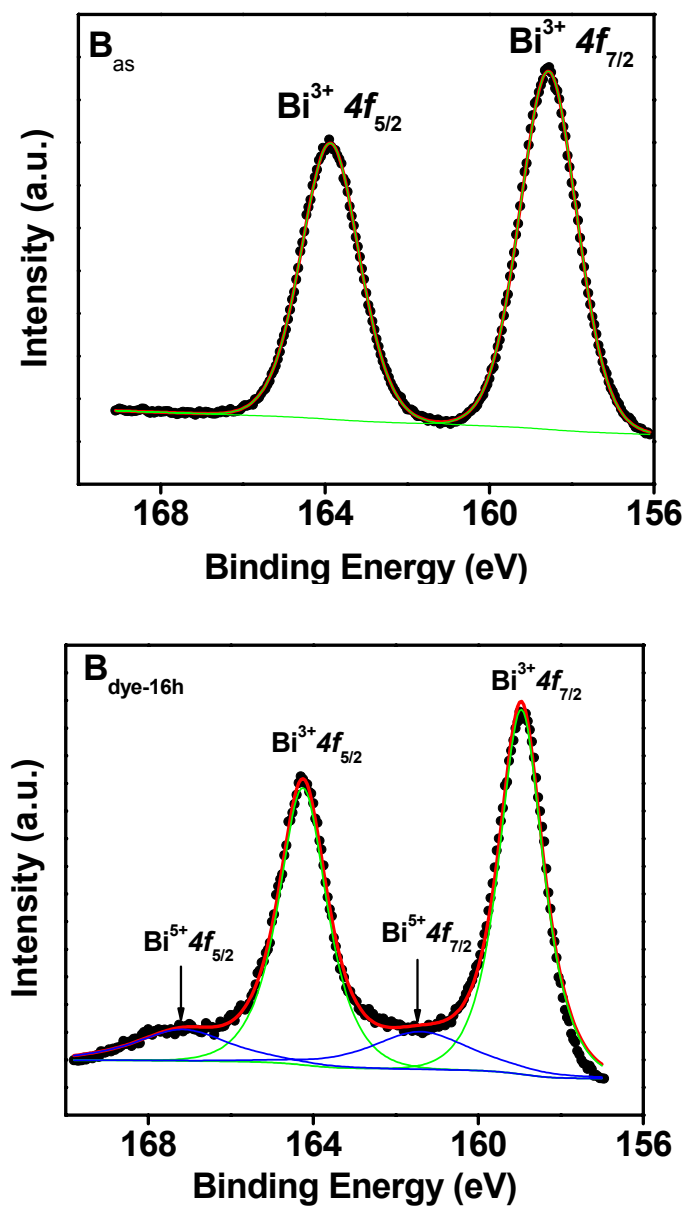

Figure S3: XPS core level of Bi 4f for samples  $B_{as}$  and  $B_{dye-16h}$ .

Supplementary Material (ESI) for New Journal of Chemistry

This journal is (c) The Royal Society of Chemistry and The Centre National de la Recherche  
Scientifique, 2010

---
